# Supplementary material for: Identification of the preferential CO and SO2adsorption sites within NOTT-401
Source: Royal Society of Chemistry journal article supplement (doi:10.1039/d0cp04668j), 2020-12-12
Supplement: d0cp04668j1.pdf [file d0cp04668j1.pdf]

## Electronic Supporting Information

### Identification of the preferential CO and SO<sub>2</sub> adsorption sites within NOTT-401

Marcos Rivera-Almazo,<sup>†,a</sup> Mariana L. Díaz-Ramírez,<sup>†,b</sup> Raymundo Hernández-Esparza,<sup>c</sup> Rubicelia Vargas,<sup>a</sup>  
Ana Martínez,<sup>d</sup> Vladimir Martis,<sup>e</sup> Paola A. Sáenz-Cavazos,<sup>f</sup> Daryl Williams,<sup>f</sup> Enrique Lima,<sup>\*,b</sup> Ilich A.  
Ibarra<sup>\*,b</sup> and Jorge Garza<sup>\*,a</sup>

---

<sup>a.</sup> *Departamento de Química, Universidad Autónoma Metropolitana-Iztapalapa, San Rafael Atlixco 186, Col. Vicentina, Iztapalapa, C. P. 09340 Ciudad de México, México. E-mail: jgo@xanum.uam.mx*

<sup>b.</sup> *Laboratorio de Físicoquímica y Reactividad de Superficies (LaFReS), Instituto de Investigaciones en Materiales, Universidad Nacional Autónoma de México, Ciudad de México, México. E-mail: argel@unam.mx and lima@iim.unam.mx*

<sup>c.</sup> *Department of Chemistry and Chemical Biology, McMaster University, Hamilton, Ontario L8S 4M1, Canada.*

<sup>d.</sup> *Departamento de Materiales de Baja Dimensionalidad- Instituto de Investigaciones en Materiales, and Facultad de Química, Universidad Nacional Autónoma de México, Circuito Exterior s/n, CU, Del. Coyoacán, 04510, Ciudad de México, México.*

<sup>e.</sup> *Surface Measurement Systems, Unit 5, Wharfside, Rosemont Road, London HA0 4PE, UK.*

<sup>f.</sup> *Surfaces and Particle Engineering Laboratory (SPEL), Department of Chemical Engineering, Imperial College London, South Kensington Campus, London SW7 2AZ, UK.*

<sup>†</sup> These authors contributed equally to this work.

---

## Table of Contents

|                                                                             |           |
|-----------------------------------------------------------------------------|-----------|
| <b>S1. Experimental Details</b>                                             | <b>3</b>  |
| <b>S2. Bulk Powder PXRD</b>                                                 | <b>3</b>  |
| <b>S3. Thermogravimetric Analysis</b>                                       | <b>3</b>  |
| <b>S4. Adsorption Isotherms of N<sub>2</sub> and SO<sub>2</sub></b>         | <b>4</b>  |
| <b>S5. Isosteric Heat of Adsorption of SO<sub>2</sub></b>                   | <b>6</b>  |
| <b>S6. SO<sub>2</sub> Cycling</b>                                           | <b>8</b>  |
| <b>S7. CO molecules per unit cell</b>                                       | <b>8</b>  |
| <b>S8. FTIR Spectroscopy</b>                                                | <b>9</b>  |
| <b>S9. Numerical details, cell parameters and atomic positions</b>          | <b>10</b> |
| <b>S10. Theoretical IR spectra for structures I and II of NOTT-401···CO</b> | <b>14</b> |
| <b>S11. References</b>                                                      | <b>14</b> |

## S1. Experimental Details

**Chemicals:** Scandium triflate ( $[\text{Sc}(\text{SO}_3\text{CF}_3)_3] \cdot x\text{H}_2\text{O}$ ), thiophene-2,5-dicarboxylic acid ( $\text{H}_2\text{TDA}$ ), *N,N*-dimethylformamide (DMF) and tetrahydrofuran (THF) were purchased from Sigma-Aldrich and used as received.

**NOTT-401 synthesis:** NOTT-401 was synthesized according to the procedure previously reported.<sup>1</sup> Briefly, scandium triflate (0.057 g, 0.116 mmol) and  $\text{H}_2\text{TDA}$ , (0.01 g, 0.058 mmol) were dispersed in THF (4.0 mL), DMF (3.0 mL),  $\text{H}_2\text{O}$  (1.0 mL) and HCl (36.5 %, 100  $\mu\text{L}$ ) and sealed in a pressure tube. The clear solution was heated at 363 K in an oil bath for 72 h. The tube was cooled to room temperature, the crystalline product was separated by filtration, washed with DMF (5.00 ml) and dried in air.

**Sample activation:** Before the adsorption experiments, the sample was acetone-exchanged to remove any uncoordinated solvents (water and DMF) from the pores. The sample was activated at 453 K for 2 h (with a heating ramp of 5 K  $\text{min}^{-1}$ ) under vacuum ( $10^{-6}$  bar) to afford the fully desolvated sample.

## S2. Bulk Powder PXRD

Powder X-Ray Diffraction Patterns (PXRD) were collected on a Rigaku Diffractometer, Ultima IV with a  $\text{Cu-K}\alpha_1$  radiation ( $\lambda = 1.5406 \text{ \AA}$ ) using a nickel filter. Patterns were recorded in the  $2\text{--}30^\circ$   $2\theta$  range with a step scan of  $0.02^\circ$  and a scan rate of  $0.08^\circ \text{ min}^{-1}$ .

## S3. Thermogravimetric Analysis

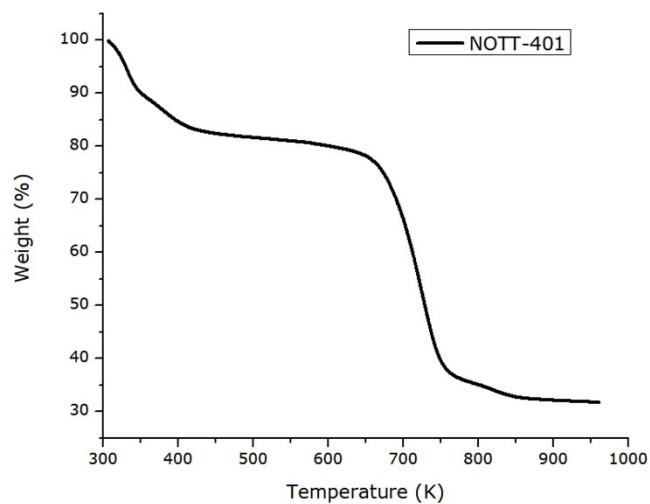

**Figure S1.** TGA trace of as synthesized NOTT-401.

#### S4. Adsorption Isotherms of N<sub>2</sub> and SO<sub>2</sub>

N<sub>2</sub> isotherms (up to  $P/P_0 = 1$  and 77 K) were recorded on a Quantachrome Autosorb MP-1 equipment under high vacuum in a clean system with a diaphragm pumping system. SO<sub>2</sub> isotherms were recorded at 298 K and up to 1 bar with the aid of a Dynamic Gravimetric Gas/Vapour Sorption Analyser, DVS Vacuum (Surface Measurements Systems Ltd.). Ultra-pure grade (99.9995%) N<sub>2</sub> and SO<sub>2</sub> were purchased from PRAXAIR.

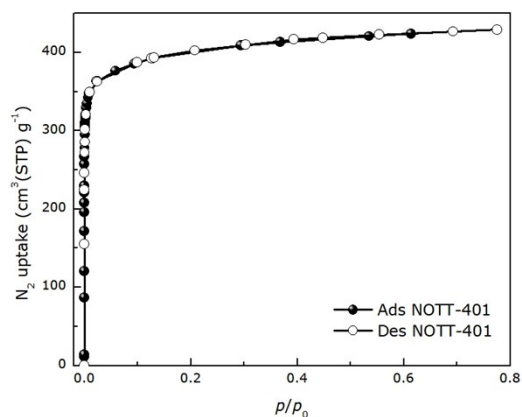

**Figure S2.** N<sub>2</sub> adsorption isotherm at 77 K of as activated NOTT-401.

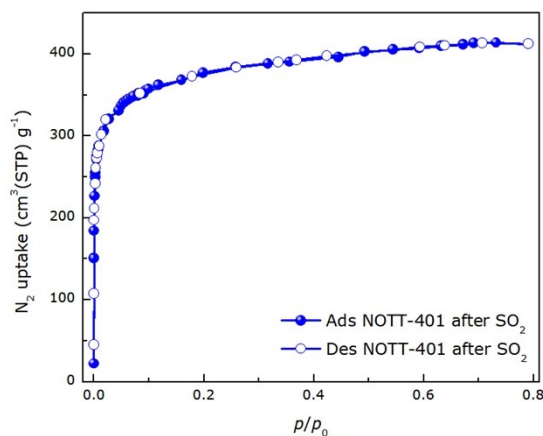

**Figure S3.** N<sub>2</sub> adsorption isotherm at 77 K of NOTT-401 after SO<sub>2</sub> adsorption-desorption experiment.

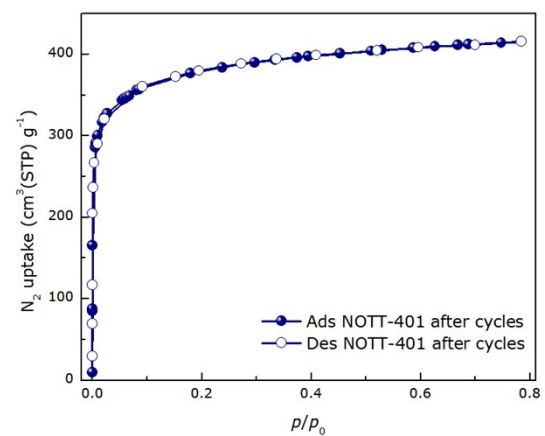

**Figure S4.**  $N_2$  adsorption isotherm at 77 K of NOTT-401 after 50  $SO_2$  adsorption/desorption cycles.

## S5. Isothermic Heat of Adsorption of SO<sub>2</sub>

The heat of adsorption of SO<sub>2</sub>,  $\Delta H$ , was calculated by the isosteric method for NOTT-401, using the corresponding adsorption isotherms at three different temperatures (**Figure S5A**, C, E). A virial-type equation was used to fit the adsorption isotherms:

$$\ln\left(\frac{n}{p}\right) = A_0 + A_1n + A_2n^2 + \dots \quad \text{Eq. S5.1}$$

where  $p$  is the pressure,  $n$  is the amount adsorbed and  $A_0, A_1, \dots$  are the virial coefficients ( $A_2$  and higher terms can be ignored at lower coverage values). A plot of  $\ln(n/p)$  versus  $n$  should give a straight line at low surface coverage (**Figure S5B**, D, F).

The obtained values and their average ( $-39.1 \text{ kJ mol}^{-1}$ ) are reported on **Table S1**.

**Table S1.** Calculated heats of adsorption at three different temperatures 298, 303 and 308 K.

| T<br>[K]    | Calculated Q <sub>st</sub><br>[kJ mol <sup>-1</sup> ] |
|-------------|-------------------------------------------------------|
| 298 and 303 | -45.1                                                 |
| 303 and 308 | -50.1                                                 |
| 298 and 308 | -38.8                                                 |
| Average=    | -44.7                                                 |

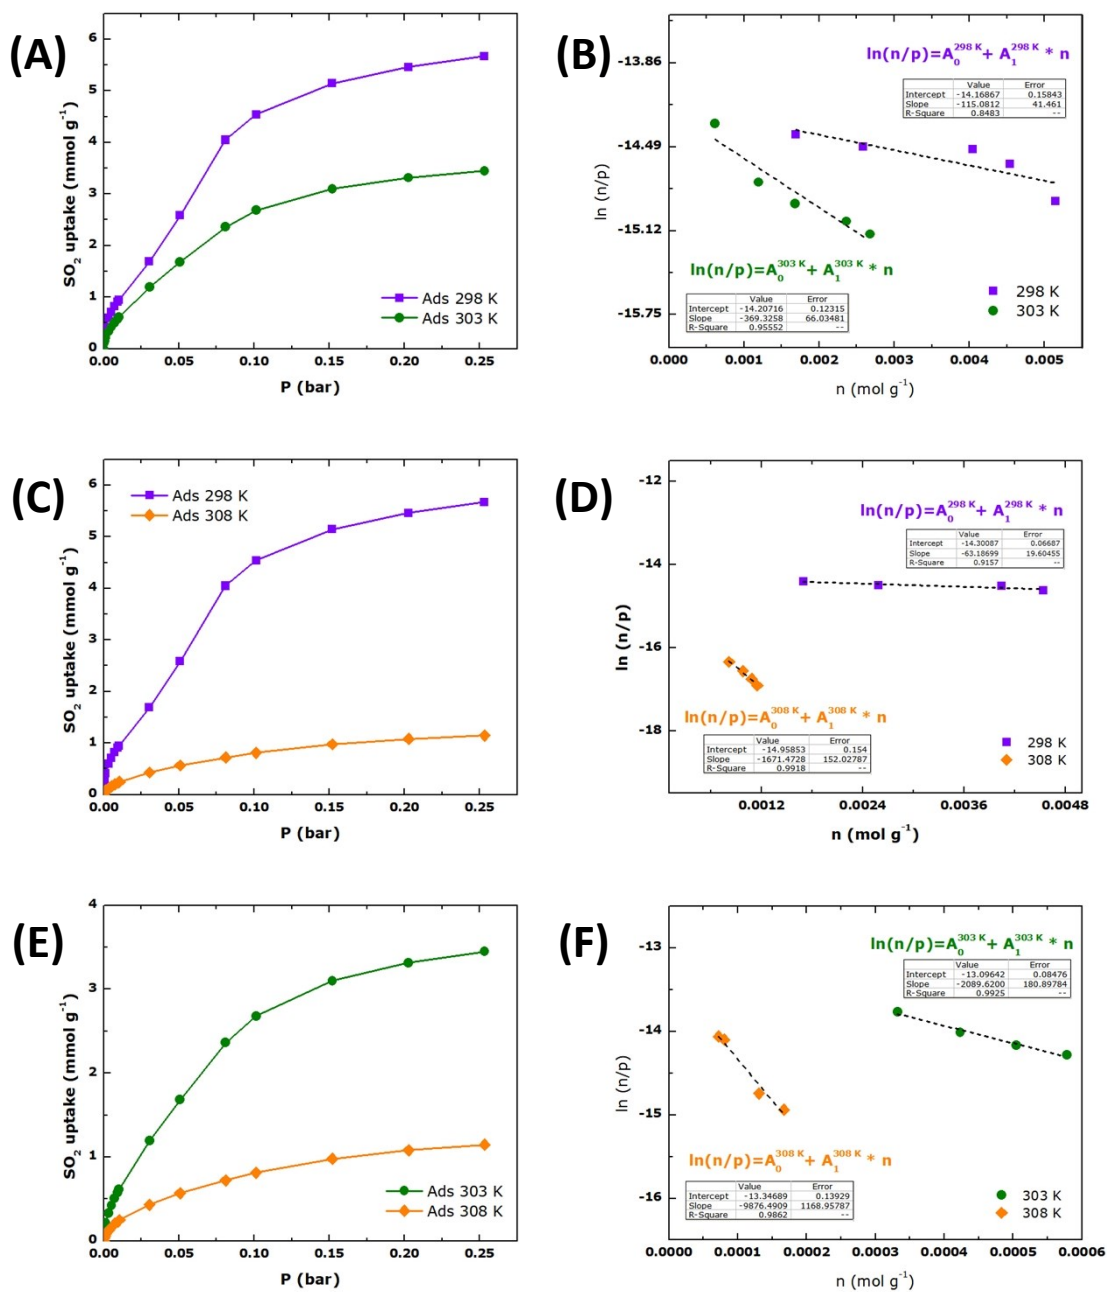

**Figure S5.** SO<sub>2</sub> adsorption isotherms at A) 298 and 303 K, C) 303 and 308 K, E) 298 and 308 K, for NOTT-401. Virial fitting plots at B) 298 and 303 K, D) 303 and 308 K, F) 298 and 308 K.

## S6. SO<sub>2</sub> Cycling

Cycling SO<sub>2</sub> experiments on NOTT-401 were carried out by operating vacuum ( $1.7 \times 10^{-6}$  Torr) for 30 minutes and 298 K. Then, we showed that the SO<sub>2</sub> capture capacity remains constant during 50 adsorption-desorption cycles ( $6.61 \pm 0.15$  mmol g<sup>-1</sup>).

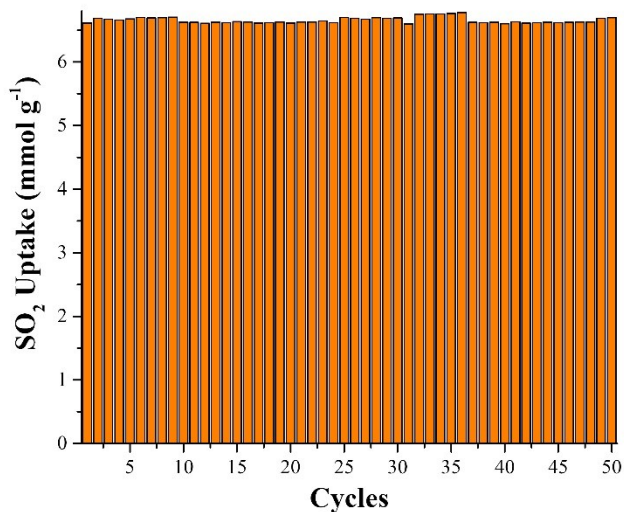

**Figure S6.** Adsorption-desorption cycles for SO<sub>2</sub> in NOTT-401 at 1 bar and 298 K. Re-activation of this sample was conducted by only operating vacuum ( $1.7 \times 10^{-6}$  Torr) for 30 minutes at 298 K

## S7. CO molecules per unit cell

From the saturated sample with an uptake of 2.24 mmol CO g<sup>-1</sup> (which corresponds to a 6.27 %w gain), it was estimated that 8.87 CO molecules were present in the unit cell.

The molecules of CO per unit cell were calculated using the following equation

$$\frac{28x}{28x + 928.22} = \%w$$

Where, 28 g mol<sup>-1</sup> and 928 g mol<sup>-1</sup> are the molar mass of carbon monoxide and one NOTT-401 unit cell, respectively



## S8. FTIR Spectroscopy

FTIR spectra were measured (in-situ and at 298 K) using an FTIR Nicolet 6700 spectrophotometer (DTGS detector) with a  $4\text{ cm}^{-1}$  resolution equipped with a diffuse reflectance vacuum chamber with  $\text{CaF}_2$  windows in a similar way to a previously reported methodology.<sup>2</sup> FTIR spectra were collected on an activated sample of NOTT-401 (10–6 bar and 180 °C for 2 hours). Pulses of CO, with an increment of 0.06 bar, were measured.

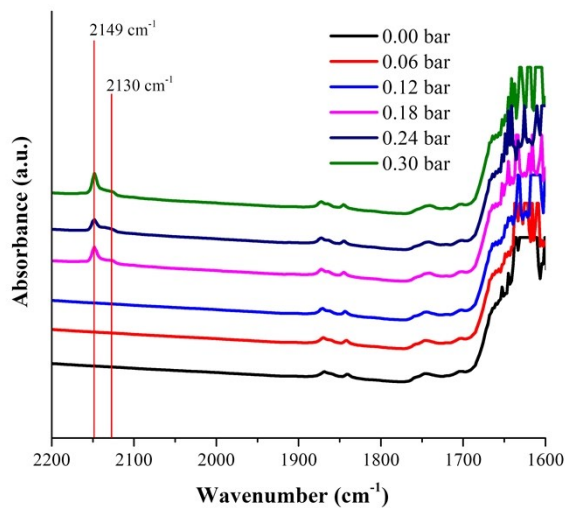

**Figure S7.** DRIFTS spectra of activated NOTT-401 at 298 K under a CO atmosphere at different CO pressures (from 0.00 bar to 0.30 bar), in the region between 2200 and 1600  $\text{cm}^{-1}$ .

## S9. Numerical details, cell parameters and atomic positions

For each structure we used the following k-point mesh 2x2x2, and the tolerances: 7, 7, 7, 9, 30, according to the CRYSTAL manual. For the IR analysis we moved 50 atoms: 8 atoms associated to  $\mu_2$ -OH groups, 32 atoms for CH groups, 8 sulfur atoms and the CO. In each unit cell there are 130 atoms. Cell parameters and atomic positions for each structure:

```
#GEOMETRY INFORMATION FOR STRUCTURE I
LATTICE PARAMETERS (ANGSTROMS AND DEGREES)
PRIMITIVE CELL - VOLUME=3253.094931 DENSITY=0.961 g/cm^3
      A           B           C           ALPHA           BETA           GAMMA
      17.30964313  17.32440924  17.21437072  97.608384  97.548309 137.436689
*****
ATOM      X/A           Y/B           Z/C
*****
21 SC    -2.109026076256E-01  4.876570531111E-01  -1.863339861316E-01
21 SC     1.695419305687E-01  -2.597966221067E-02  -3.170187534469E-01
21 SC     4.851553508850E-01  1.731385798583E-01  -3.045039486452E-01
21 SC    -2.552537619849E-02  -2.089164427374E-01  -1.969550656114E-01
21 SC     2.094808526821E-01  -4.854061409819E-01  1.832245001032E-01
21 SC    -1.712542006341E-01  2.794789007635E-02  3.140266647654E-01
21 SC    -4.860032937804E-01  -1.709827483647E-01  3.014545206258E-01
21 SC     2.516774414421E-02  2.117844423224E-01  1.946343107513E-01
16 S     -1.276938746915E-01  -1.424297276419E-01  2.046369084708E-02
16 S     3.362178666345E-01  -1.443651530653E-01  4.758591072120E-01
16 S     1.280348757212E-01  1.457380070023E-01  -2.219980943966E-02
16 S    -3.374282550316E-01  1.466735825100E-01  -4.787539752926E-01
16 S     1.454182077834E-01  1.249335787774E-01  4.810624287114E-01
16 S     1.410243734671E-01  -3.351603520715E-01  1.647310308437E-02
16 S    -1.464769131273E-01  -1.221052472363E-01  -4.830858148263E-01
16 S    -1.419932297806E-01  3.368620405339E-01  -1.983183829982E-02
 8 O     -1.534179046246E-01  -3.954994797253E-01  -2.532372528544E-01
 8 O     3.533431635735E-01  9.982842046507E-02  -2.490279755515E-01
 8 O     9.843022781439E-02  -1.522978185479E-01  -2.566329443136E-01
 8 O    -3.979358494194E-01  3.565578022927E-01  -2.443680498165E-01
 8 O     1.528207114178E-01  3.985468240378E-01  2.507354990628E-01
 8 O    -3.547679873578E-01  -9.886778558092E-02  2.460790793007E-01
 8 O    -1.001368470716E-01  1.538262146846E-01  2.532213695944E-01
 8 O     3.965680246053E-01  -3.552434961516E-01  2.420453073603E-01
 1 H    -1.610516068458E-01  -4.233691250170E-01  -3.092352399874E-01
 1 H     3.807157629284E-01  1.456648472560E-01  -1.922506387766E-01
 1 H     1.449747791042E-01  -1.620788829699E-01  -2.379512682559E-01
 1 H    -4.264727138625E-01  3.842076258526E-01  -2.634689984469E-01
 1 H     1.599467489195E-01  4.260282645449E-01  3.066430263300E-01
 1 H    -3.849754706109E-01  -1.524936061810E-01  1.917267352237E-01
 1 H    -1.492034930564E-01  1.599255807180E-01  2.317587064295E-01
 1 H     4.224845931030E-01  -3.826305608281E-01  2.671641820864E-01
 8 O    -2.220678137489E-01  -4.255498174507E-01  -9.603311681778E-02
 8 O     1.674685512377E-01  -1.279918045524E-01  -4.046740728699E-01
 8 O     1.856717714079E-01  8.504471449584E-02  -2.225206419765E-01
 8 O    -1.954136314331E-01  4.115072726543E-01  -2.83806994622E-01
 8 O     4.094370231550E-01  1.936315020673E-01  -3.974304064689E-01
 8 O     8.541410029478E-02  -1.934888228862E-01  -1.031740153121E-01
 8 O    -1.265622189336E-01  -2.212826621563E-01  -2.962706614686E-01
 8 O    -4.292298044122E-01  1.698389748474E-01  -2.053435320330E-01
 8 O     2.190244144651E-01  4.274489219760E-01  9.172289399632E-02
 8 O    -1.689068529588E-01  1.303947306730E-01  4.013785229345E-01
 8 O    -1.849432550617E-01  -8.247858585578E-02  2.211597042913E-01
 8 O     1.947974912652E-01  -4.076344759681E-01  2.797840816536E-01
 8 O    -4.111161264824E-01  -1.923656786614E-01  3.942787641712E-01
 8 O    -8.643811263284E-02  1.957739196923E-01  1.007484107015E-01
 8 O     1.261024217335E-01  2.252106841510E-01  2.947549801300E-01
 8 O     4.273700141153E-01  -1.683644270957E-01  2.027684597486E-01
 8 O    -2.938174732473E-02  -3.839334264556E-01  -1.099902557625E-01
 8 O     2.221962737788E-01  7.787911747317E-02  -3.944529378253E-01
 8 O    -7.998837689661E-03  -1.249184173778E-01  -3.732580358363E-01
 8 O    -2.527408900243E-01  3.652817762764E-01  -1.319356478322E-01
 8 O     3.634858356236E-01  -3.351865651982E-03  -3.854814103187E-01
 8 O    -1.248303202336E-01  -2.523770393773E-01  -1.180905423519E-01
 8 O     8.100546301369E-02  -2.708228521086E-02  -1.441704320307E-01
 8 O    -3.858949189365E-01  2.256012597936E-01  -3.571862552715E-01
 8 O     2.753089567041E-02  3.861323751485E-01  1.079251916440E-01
```

|     |                     |                     |                     |
|-----|---------------------|---------------------|---------------------|
| 8 O | -2.230965582061E-01 | -7.515484328873E-02 | 3.922593085996E-01  |
| 8 O | 6.984848074313E-03  | 1.282562937027E-01  | 3.713417912151E-01  |
| 8 O | 2.530833981254E-01  | -3.636008160361E-01 | 1.273040873523E-01  |
| 8 O | -3.649463863878E-01 | 5.360276351507E-03  | 3.823544296691E-01  |
| 8 O | 1.242494664970E-01  | 2.558663350694E-01  | 1.154347745755E-01  |
| 8 O | -7.998575203316E-02 | 3.013938764816E-02  | 1.430301440367E-01  |
| 8 O | 3.854547137020E-01  | -2.231571306933E-01 | 3.550926079046E-01  |
| 6 C | -1.800511461936E-01 | -3.246861839191E-01 | -7.744241007907E-02 |
| 6 C | 2.508005939858E-01  | -1.020097641228E-01 | -4.240627278562E-01 |
| 6 C | 1.462043890004E-01  | 6.934361077487E-02  | -1.622038716460E-01 |
| 6 C | -2.720520590682E-01 | 3.102866735676E-01  | -3.424596031358E-01 |
| 6 C | 3.077141484481E-01  | 1.497352064443E-01  | -4.226971585441E-01 |
| 6 C | 6.866896904786E-02  | -2.698671559786E-01 | -7.962552013208E-02 |
| 6 C | -1.037402166758E-01 | -1.804351084598E-01 | -3.560603261026E-01 |
| 6 C | -3.269298480780E-01 | 2.524534878661E-01  | -1.473587100121E-01 |
| 6 C | 1.779910977517E-01  | 3.270709159157E-01  | 7.386348957238E-02  |
| 6 C | -2.522793484164E-01 | 1.042737886841E-01  | 4.207725944624E-01  |
| 6 C | -1.453900414028E-01 | -6.644463660909E-02 | 1.608556279261E-01  |
| 6 C | 2.714533046305E-01  | -3.071473004968E-01 | 3.392975509741E-01  |
| 6 C | -3.089556154736E-01 | -1.476208974668E-01 | 4.200407463254E-01  |
| 6 C | -7.013227197544E-02 | 2.719798846321E-01  | 7.730556806432E-02  |
| 6 C | 1.027886105446E-01  | 1.837911892167E-01  | 3.543059117409E-01  |
| 6 C | 3.260529067327E-01  | -2.508123997924E-01 | 1.438872005644E-01  |
| 6 C | -1.927369285844E-01 | -2.853009162530E-01 | -4.976606103213E-03 |
| 6 C | 2.188414507097E-01  | -1.879415216817E-01 | -4.948138870332E-01 |
| 6 C | 1.757237842145E-01  | 1.665784976002E-01  | -1.088110590529E-01 |
| 6 C | -2.295143969072E-01 | 2.867588165177E-01  | -3.978407434226E-01 |
| 6 C | 2.844302788115E-01  | 1.822381325251E-01  | -4.883773922857E-01 |
| 6 C | 1.667358190673E-01  | -2.270014610087E-01 | -1.345955544576E-02 |
| 6 C | -1.897416563109E-01 | -1.952639454885E-01 | -4.092024203220E-01 |
| 6 C | -2.884503759755E-01 | 2.197600442499E-01  | -9.414710908665E-02 |
| 6 C | 1.904411252622E-01  | 2.872913657844E-01  | 1.514752439852E-03  |
| 6 C | -2.203065968345E-01 | 1.903897753829E-01  | 4.913589619897E-01  |
| 6 C | -1.757522596537E-01 | -1.639758170773E-01 | 1.068793099107E-01  |
| 6 C | 2.284840963569E-01  | -2.838606276444E-01 | 3.943934125253E-01  |
| 6 C | -2.857192545943E-01 | -1.799339868132E-01 | 4.859227536517E-01  |
| 6 C | -1.681929608516E-01 | 2.288720382538E-01  | 1.093114824426E-02  |
| 6 C | 1.885991898968E-01  | 1.982106456953E-01  | 4.072492790122E-01  |
| 6 C | 2.872661677503E-01  | -2.180878037754E-01 | 9.107733175409E-02  |
| 6 C | -2.457122912154E-01 | -3.422608693192E-01 | 5.034914507318E-02  |
| 6 C | 1.067813693998E-01  | -3.012697919131E-01 | 4.547742250093E-01  |
| 6 C | 2.341418562480E-01  | 2.745268111190E-01  | -1.172749708842E-01 |
| 6 C | -1.134686511727E-01 | 3.591431032126E-01  | -3.957485203434E-01 |
| 6 C | 3.561687540477E-01  | 2.518691830549E-01  | 4.672599308341E-01  |
| 6 C | 2.797681521286E-01  | -1.109072955576E-01 | 3.170463950638E-02  |
| 6 C | -3.026618074645E-01 | -2.578829564788E-01 | -4.097451485136E-01 |
| 6 C | -3.499545073485E-01 | 1.075860376682E-01  | -9.379424727127E-02 |
| 6 C | 2.414582772343E-01  | 3.428065095206E-01  | -5.490540487985E-02 |
| 6 C | -1.081990436286E-01 | 3.041230183892E-01  | -4.587571233651E-01 |
| 6 C | -2.351994017835E-01 | -2.727229185694E-01 | 1.145029850016E-01  |
| 6 C | 1.122960143156E-01  | -3.560052336082E-01 | 3.917361952875E-01  |
| 6 C | -3.57532504741E-01  | -2.495418238991E-01 | -4.697457297829E-01 |
| 6 C | -2.815135186492E-01 | 1.127891767756E-01  | -3.380105592687E-02 |
| 6 C | 3.013570687268E-01  | 2.605554323908E-01  | 4.075489510177E-01  |
| 6 C | 3.483361526503E-01  | -1.058117797273E-01 | 9.142798329298E-02  |
| 1 H | -2.891263397280E-01 | -4.306618265187E-01 | 4.486646154193E-02  |
| 1 H | 2.386659297079E-02  | -3.424643049876E-01 | 4.634486792173E-01  |
| 1 H | 2.686545617622E-01  | 3.018513709541E-01  | -1.678209342245E-01 |
| 1 H | -3.530628782839E-02 | 4.486368619418E-01  | -3.495643781573E-01 |
| 1 H | 4.450035137397E-01  | 2.941397501130E-01  | 4.776111120250E-01  |
| 1 H | 3.109190571430E-01  | -3.259465514690E-02 | 2.185826779609E-02  |
| 1 H | -3.435626794850E-01 | -3.077524513922E-01 | -3.678082232403E-01 |
| 1 H | -4.413954116181E-01 | 2.479844215833E-02  | -1.359305651236E-01 |
| 1 H | 2.813878300481E-01  | 4.292698899690E-01  | -5.135356161509E-02 |
| 1 H | -2.543429536443E-02 | 3.453965259580E-01  | -4.678156781955E-01 |
| 1 H | -2.689906421862E-01 | -3.001765433009E-01 | 1.652439208538E-01  |
| 1 H | 3.421789173826E-02  | -4.451498069027E-01 | 3.451724348211E-01  |
| 1 H | -4.464847957656E-01 | -2.919927460025E-01 | -4.802953523942E-01 |
| 1 H | -3.130275538539E-01 | 3.456171056022E-02  | -2.338576986143E-02 |
| 1 H | 3.422041138886E-01  | 3.104833495769E-01  | 3.656297171837E-01  |
| 1 H | 4.395638190102E-01  | -2.304874428974E-02 | 1.338588226882E-01  |

6 C -4.736568031353E-01 -3.266865023435E-01 1.020741746225E-01  
 8 O -4.985577448504E-01 -4.083814379378E-01 7.565031836660E-02

#GEOMETRY INFORMATION FOR STRUCTURE II

LATTICE PARAMETERS (ANGSTROMS AND DEGREES)

PRIMITIVE CELL - VOLUME=3288.008138 DENSITY=0.951 g/cm<sup>3</sup>

A B C ALPHA BETA GAMMA  
 16.91623083 16.93353332 17.64360801 97.804245 97.848304 135.751199  
 \*\*\*\*\*

ATOM X/A Y/B Z/C  
 \*\*\*\*\*

21 SC -1.749606215696E-01 -4.919677766995E-01 -1.993055319732E-01  
 21 SC 2.083482055900E-01 2.344212964980E-02 -3.011281241393E-01  
 21 SC -4.870111728235E-01 2.053878998721E-01 -3.085640589553E-01  
 21 SC 1.635104503558E-02 -1.792333463871E-01 -1.914800158018E-01  
 21 SC 1.774529347016E-01 4.924465991013E-01 1.993019351971E-01  
 21 SC -2.067989007972E-01 -2.332571558316E-02 2.998396251613E-01  
 21 SC 4.896461954149E-01 -2.050862893383E-01 3.093564045044E-01  
 21 SC -1.224657205293E-02 1.803543582841E-01 1.913418574739E-01  
 16 S -1.174968521638E-01 -1.425051111374E-01 1.790029235468E-02  
 16 S 3.411943958184E-01 -1.385062759165E-01 4.840833827662E-01  
 16 S 1.212590657164E-01 1.438224507247E-01 -1.782824847402E-02  
 16 S -3.366037470643E-01 1.373745510068E-01 -4.807076790118E-01  
 16 S 1.409266210131E-01 1.206106934337E-01 4.787970710065E-01  
 16 S 1.425370277720E-01 -3.384416009318E-01 2.189242878720E-02  
 16 S -1.391457041589E-01 -1.230737835890E-01 -4.807348943876E-01  
 16 S -1.407592855488E-01 3.400207855987E-01 -1.962425436684E-02  
 8 O -1.057076901013E-01 -3.621330535433E-01 -2.545209474391E-01  
 8 O 3.935309662616E-01 1.481912175552E-01 -2.453356158052E-01  
 8 O 1.483137580985E-01 -1.043226698646E-01 -2.456281715480E-01  
 8 O -3.586176934704E-01 3.915293663607E-01 -2.549159650003E-01  
 8 O 1.101367186849E-01 3.633576037102E-01 2.547020286035E-01  
 8 O -3.916454835246E-01 -1.448839947714E-01 2.447685375707E-01  
 8 O -1.439762887226E-01 1.063791345774E-01 2.457739920382E-01  
 8 O 3.617004258189E-01 -3.905429795039E-01 2.521143384484E-01  
 1 H -1.478940829375E-01 -3.897022832011E-01 -3.112227981084E-01  
 1 H 4.225160901802E-01 1.615799721863E-01 -1.889123347927E-01  
 1 H 1.694762823317E-01 -1.434501133460E-01 -2.565240160503E-01  
 1 H -3.872463020334E-01 4.226121366080E-01 -2.417103391687E-01  
 1 H 1.531095908993E-01 3.905834718171E-01 3.110788184996E-01  
 1 H -4.205336147585E-01 -1.573261674257E-01 1.885710575779E-01  
 1 H -1.644487780105E-01 1.461574201947E-01 2.567859449298E-01  
 1 H 3.906292517107E-01 -4.212117236101E-01 2.386222849425E-01  
 8 O -1.941773273950E-01 -4.123134489627E-01 -1.088557938311E-01  
 8 O 1.983169863874E-01 -8.480411444333E-02 -3.922132359646E-01  
 8 O 2.182887565876E-01 1.233014410115E-01 -2.033651939450E-01  
 8 O -1.715129605168E-01 4.223476040149E-01 -2.978331762381E-01  
 8 O 4.260349092710E-01 2.194783339356E-01 -3.961103205453E-01  
 8 O 1.204913404663E-01 -1.786186139270E-01 -1.062032657920E-01  
 8 O -9.431169435445E-02 -1.978947533405E-01 -2.886880288787E-01  
 8 O -4.086144668970E-01 1.930824849529E-01 -2.107064402929E-01  
 8 O 1.931710398705E-01 4.114025751039E-01 1.065454968721E-01  
 8 O -1.947326587683E-01 8.563138543818E-02 3.923916475679E-01  
 8 O -2.208416539749E-01 -1.251328872774E-01 2.002190705255E-01  
 8 O 1.760991911055E-01 -4.208691455981E-01 2.986577000099E-01  
 8 O -4.249525693799E-01 -2.231112493857E-01 3.938813366988E-01  
 8 O -1.152173708005E-01 1.800175607371E-01 1.055222363656E-01  
 8 O 9.744674565013E-02 1.983126038283E-01 2.882435998248E-01  
 8 O 4.067979421015E-01 -1.918073906018E-01 2.161169700706E-01  
 8 O 1.617535130197E-03 -3.718358108830E-01 -1.208428036004E-01  
 8 O 2.503637841566E-01 1.223518718130E-01 -3.786731435675E-01  
 8 O 2.883186465464E-02 -7.717097038375E-02 -3.537279181719E-01  
 8 O -2.216303161929E-01 3.809551234906E-01 -1.474255109352E-01  
 8 O 3.882998944212E-01 2.593047486317E-02 -3.837839960301E-01  
 8 O -8.463098995114E-02 -2.278381080287E-01 -1.138927548018E-01  
 8 O 1.067626697172E-01 -4.471110465993E-03 -1.376617364962E-01  
 8 O -3.647100400527E-01 2.430741980092E-01 -3.612864659371E-01  
 8 O 2.702335369717E-04 3.731074315193E-01 1.228031467892E-01  
 8 O -2.484989219242E-01 -1.232680297544E-01 3.768372566781E-01  
 8 O -2.782137271997E-02 7.399607865561E-02 3.509172485967E-01  
 8 O 2.232236591716E-01 -3.806167830448E-01 1.476110056663E-01

|     |                     |                     |                     |
|-----|---------------------|---------------------|---------------------|
| 8 O | -3.841972106786E-01 | -2.658885974603E-02 | 3.867142402363E-01  |
| 8 O | 8.980653718868E-02  | 2.295718736474E-01  | 1.144529431944E-01  |
| 8 O | -1.034865417880E-01 | 5.249708465517E-03  | 1.376298285691E-01  |
| 8 O | 3.697952468536E-01  | -2.451715806059E-01 | 3.662871901447E-01  |
| 6 C | -1.518863802284E-01 | -3.107879431275E-01 | -8.426563874841E-02 |
| 6 C | 2.752299566666E-01  | -6.895319048442E-02 | -4.153293051802E-01 |
| 6 C | 1.704652155422E-01  | 9.613031309777E-02  | -1.484758314214E-01 |
| 6 C | -2.534454074340E-01 | 3.189523070287E-01  | -3.519297059582E-01 |
| 6 C | 3.247946270423E-01  | 1.785111504990E-01  | -4.162853947289E-01 |
| 6 C | 9.778570682785E-02  | -2.599549297632E-01 | -8.508820647054E-02 |
| 6 C | -7.295943509748E-02 | -1.512896786040E-01 | -3.441271053819E-01 |
| 6 C | -3.057987819436E-01 | 2.700017934289E-01  | -1.560417492362E-01 |
| 6 C | 1.528863756360E-01  | 3.108068636532E-01  | 8.272514449203E-02  |
| 6 C | -2.712198617464E-01 | 6.914337755909E-02  | 4.168438315539E-01  |
| 6 C | -1.709369012092E-01 | -9.694111271749E-02 | 1.464413789827E-01  |
| 6 C | 2.581286597885E-01  | -3.191710693439E-01 | 3.545705513773E-01  |
| 6 C | -3.230817045665E-01 | -1.808317658788E-01 | 4.141374536571E-01  |
| 6 C | -9.406688484463E-02 | 2.611623880736E-01  | 8.542296998387E-02  |
| 6 C | 7.470452900099E-02  | 1.494855107754E-01  | 3.424987147333E-01  |
| 6 C | 3.066370696164E-01  | -2.687573896965E-01 | 1.587100949189E-01  |
| 6 C | -1.807487033529E-01 | -2.849191140768E-01 | -1.751139421260E-02 |
| 6 C | 2.337961001030E-01  | -1.643724521879E-01 | -4.825791706167E-01 |
| 6 C | 1.876897404463E-01  | 1.835939394536E-01  | -9.340935903357E-02 |
| 6 C | -2.212670725541E-01 | 2.817335272831E-01  | -4.078553470522E-01 |
| 6 C | 2.883545589021E-01  | 1.944626364116E-01  | -4.871632944463E-01 |
| 6 C | 1.853257178928E-01  | -2.258516890849E-01 | -1.481084445850E-02 |
| 6 C | -1.698002624304E-01 | -1.832478874820E-01 | -4.019382227908E-01 |
| 6 C | -2.800401017210E-01 | 2.311078620685E-01  | -9.813413004271E-02 |
| 6 C | 1.792363504592E-01  | 2.839495100249E-01  | 1.455878342310E-02  |
| 6 C | -2.295720187802E-01 | 1.647737867975E-01  | 4.840790207648E-01  |
| 6 C | -1.899261113173E-01 | -1.851060137446E-01 | 9.029127780135E-02  |
| 6 C | 2.255956128621E-01  | -2.816535206947E-01 | 4.098226879216E-01  |
| 6 C | -2.865562814327E-01 | -1.970150226721E-01 | 4.848393452696E-01  |
| 6 C | -1.811541157262E-01 | 2.268371206528E-01  | 1.479810904827E-02  |
| 6 C | 1.712775427008E-01  | 1.808770545156E-01  | 4.001138558460E-01  |
| 6 C | 2.826032139788E-01  | -2.298089084091E-01 | 9.968664270612E-02  |
| 6 C | -2.513503314103E-01 | -3.571595434031E-01 | 2.450630932268E-02  |
| 6 C | 1.189649638367E-01  | -2.751804431064E-01 | 4.734514646872E-01  |
| 6 C | 2.484734025481E-01  | 2.961627960402E-01  | -9.226284616288E-02 |
| 6 C | -1.102894010532E-01 | 3.435504386678E-01  | -4.119311328793E-01 |
| 6 C | 3.531234529470E-01  | 2.591045544925E-01  | 4.657412790038E-01  |
| 6 C | 2.992059703018E-01  | -1.147459847592E-01 | 3.028678617406E-02  |
| 6 C | -2.852247764996E-01 | -2.542868418929E-01 | -4.038673238396E-01 |
| 6 C | -3.499218029355E-01 | 1.176269149045E-01  | -9.610412487223E-02 |
| 6 C | 2.435201950740E-01  | 3.533025683761E-01  | -3.084967751248E-02 |
| 6 C | -1.150194336594E-01 | 2.768824773506E-01  | -4.734699857485E-01 |
| 6 C | -2.565938564232E-01 | -3.003138687460E-01 | 8.590393198224E-02  |
| 6 C | 1.142877460316E-01  | -3.420167002326E-01 | 4.1213477393872E-01 |
| 6 C | -3.515695279782E-01 | -2.616809983486E-01 | -4.681388866229E-01 |
| 6 C | -2.933510584814E-01 | 1.151085304243E-01  | -3.198114264604E-02 |
| 6 C | 2.865977792998E-01  | 2.518580016603E-01  | 4.017583409194E-01  |
| 6 C | 3.549804134458E-01  | -1.170563740201E-01 | 9.527122492536E-02  |
| 1 H | -2.969547811322E-01 | -4.479539437214E-01 | 1.113057220408E-02  |
| 1 H | 4.128002587516E-02  | -3.059851531489E-01 | 4.854167481214E-01  |
| 1 H | 2.942012153198E-01  | 3.350038466683E-01  | -1.350808417162E-01 |
| 1 H | -2.866916478507E-02 | 4.339307739397E-01  | -3.712723492466E-01 |
| 1 H | 4.455829051069E-01  | 3.096490272718E-01  | 4.775269311054E-01  |
| 1 H | 3.401143101937E-01  | -3.467161488897E-02 | 1.653548026129E-02  |
| 1 H | -3.196102865982E-01 | -2.983879830671E-01 | -3.595641208276E-01 |
| 1 H | -4.386262152066E-01 | 3.926956374588E-02  | -1.403026807681E-01 |
| 1 H | 2.842865304848E-01  | 4.418813930564E-01  | -2.017761170785E-02 |
| 1 H | -3.755390493871E-02 | 3.087974967241E-01  | -4.867139269773E-01 |
| 1 H | -3.068093409840E-01 | -3.412936460888E-01 | 1.263297381906E-01  |
| 1 H | 3.250274994589E-02  | -4.314189222548E-01 | 3.703474659277E-01  |
| 1 H | -4.440927967405E-01 | -3.123005463716E-01 | -4.801945688630E-01 |
| 1 H | -3.325908446333E-01 | 3.460536233289E-02  | -1.977730484559E-02 |
| 1 H | 3.207562008917E-01  | 2.960327531984E-01  | 3.574568854638E-01  |
| 1 H | 4.447023076280E-01  | -3.912428069857E-02 | 1.384305047232E-01  |
| 8 O | 4.462434122059E-01  | -2.446452281470E-01 | 4.680855328969E-02  |
| 6 C | 3.674149630673E-01  | -3.438466781575E-01 | 1.003826926132E-02  |

## S10. Theoretical IR spectra for structures I and II of NOTT-401 $\cdots$ CO

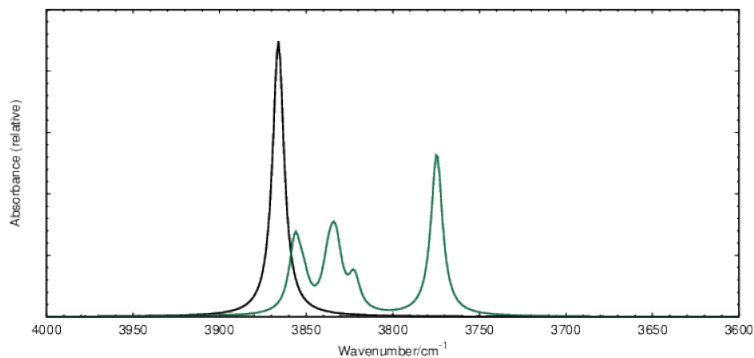

**Figure S8.** Theoretical IR for NOTT-401 (black) and structure I of NOTT-401 $\cdots$ CO (green).

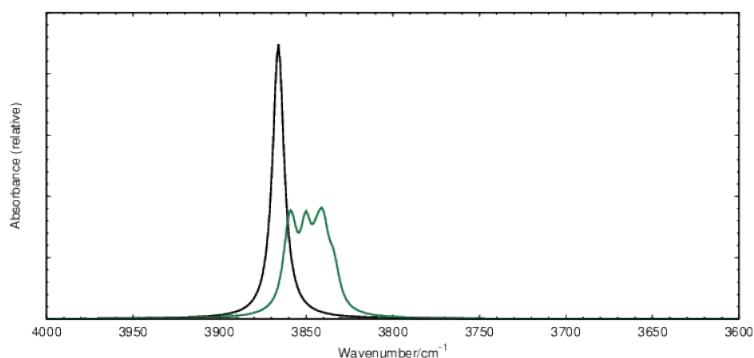

**Figure S9.** Theoretical IR for NOTT-401 (black) and structure II of NOTT-401 $\cdots$ CO (green).

## S11. References

- 1 I. A. Ibarra, S. Yang, X. Lin, A. J. Blake, P. J. Rizkallah, H. Nowell, D. R. Allan, N. R. Champness, P. Hubberstey and M. Schröder, Highly porous and robust scandium-based metal-organic frameworks for hydrogen storage, *Chem. Commun.*, 2011, **47**, 8304–8306.
- 2 B. Landeros-Rivera, I. A. Ibarra, M. L. Díaz-Ramírez, R. Vargas, H. A. Lara-García, J. Garza and A. Martínez, A detailed description of the CO molecule adsorbed in InOF-1, *Phys. Chem. Chem. Phys.*, 2020, **22**, 7969–7974.
